# Supplementary material for: Evolutionary diversification of cytokinin-specific glucosyltransferases in angiosperms and enigma of missing cis-zeatin O-glucosyltransferase gene in Brassicaceae
Source: PubMed Central journal article supplement (PMC8041765; doi:10.1038/s41598-021-87047-8), 2021-04-12

# Evolutionary diversification of cytokinin-specific glucosyltransferases in angiosperms and enigma of missing *cis*-zeatin O-glucosyltransferase gene in Brassicaceae

Lenka Závěská Drábková, David Honys and Václav Motyka

Figure S1. Comparison of the alignment of the plant secondary product glycosyltransferase (PSPG) domain in basal angiosperms, monocots and dicots. Consensus sequences were generated for taxonomic groups (orders).

## MONOCOTS

### Amborellales

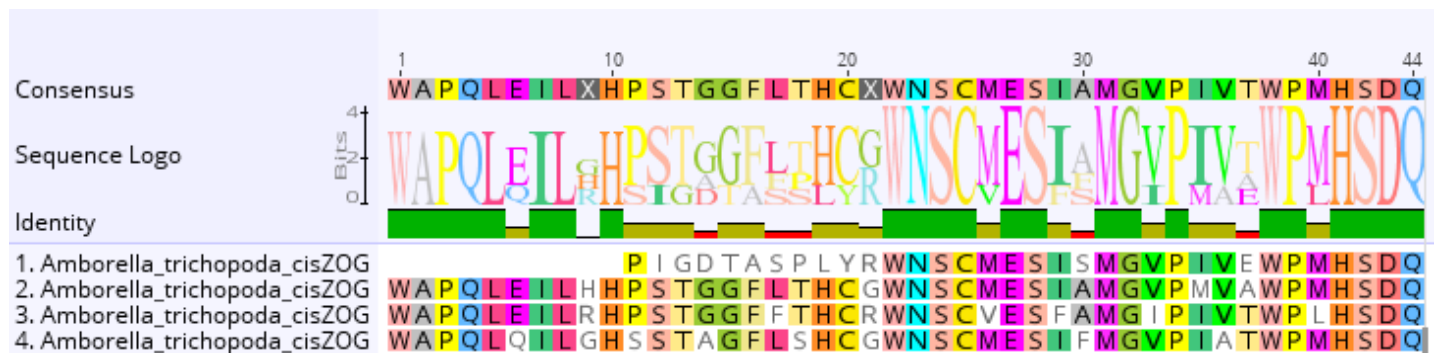

### Asparagales, Arecales

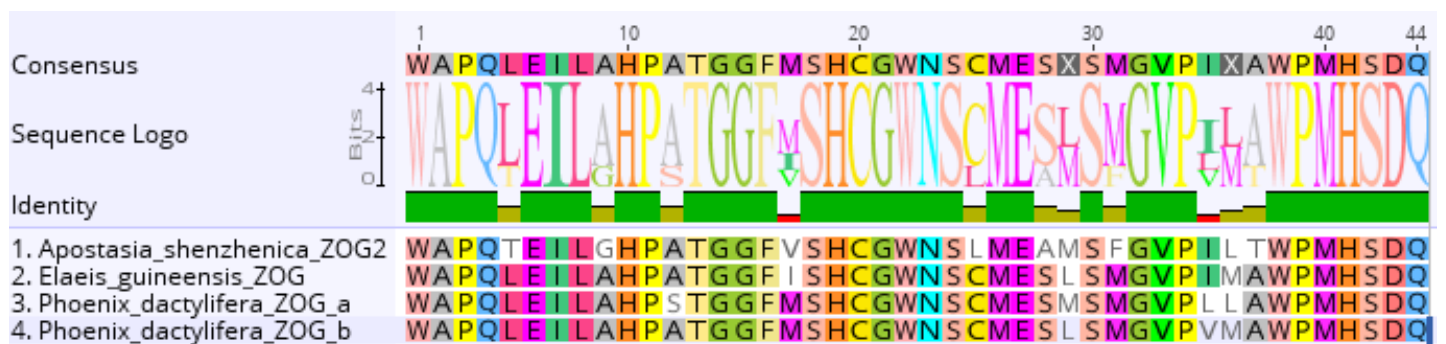

Poales

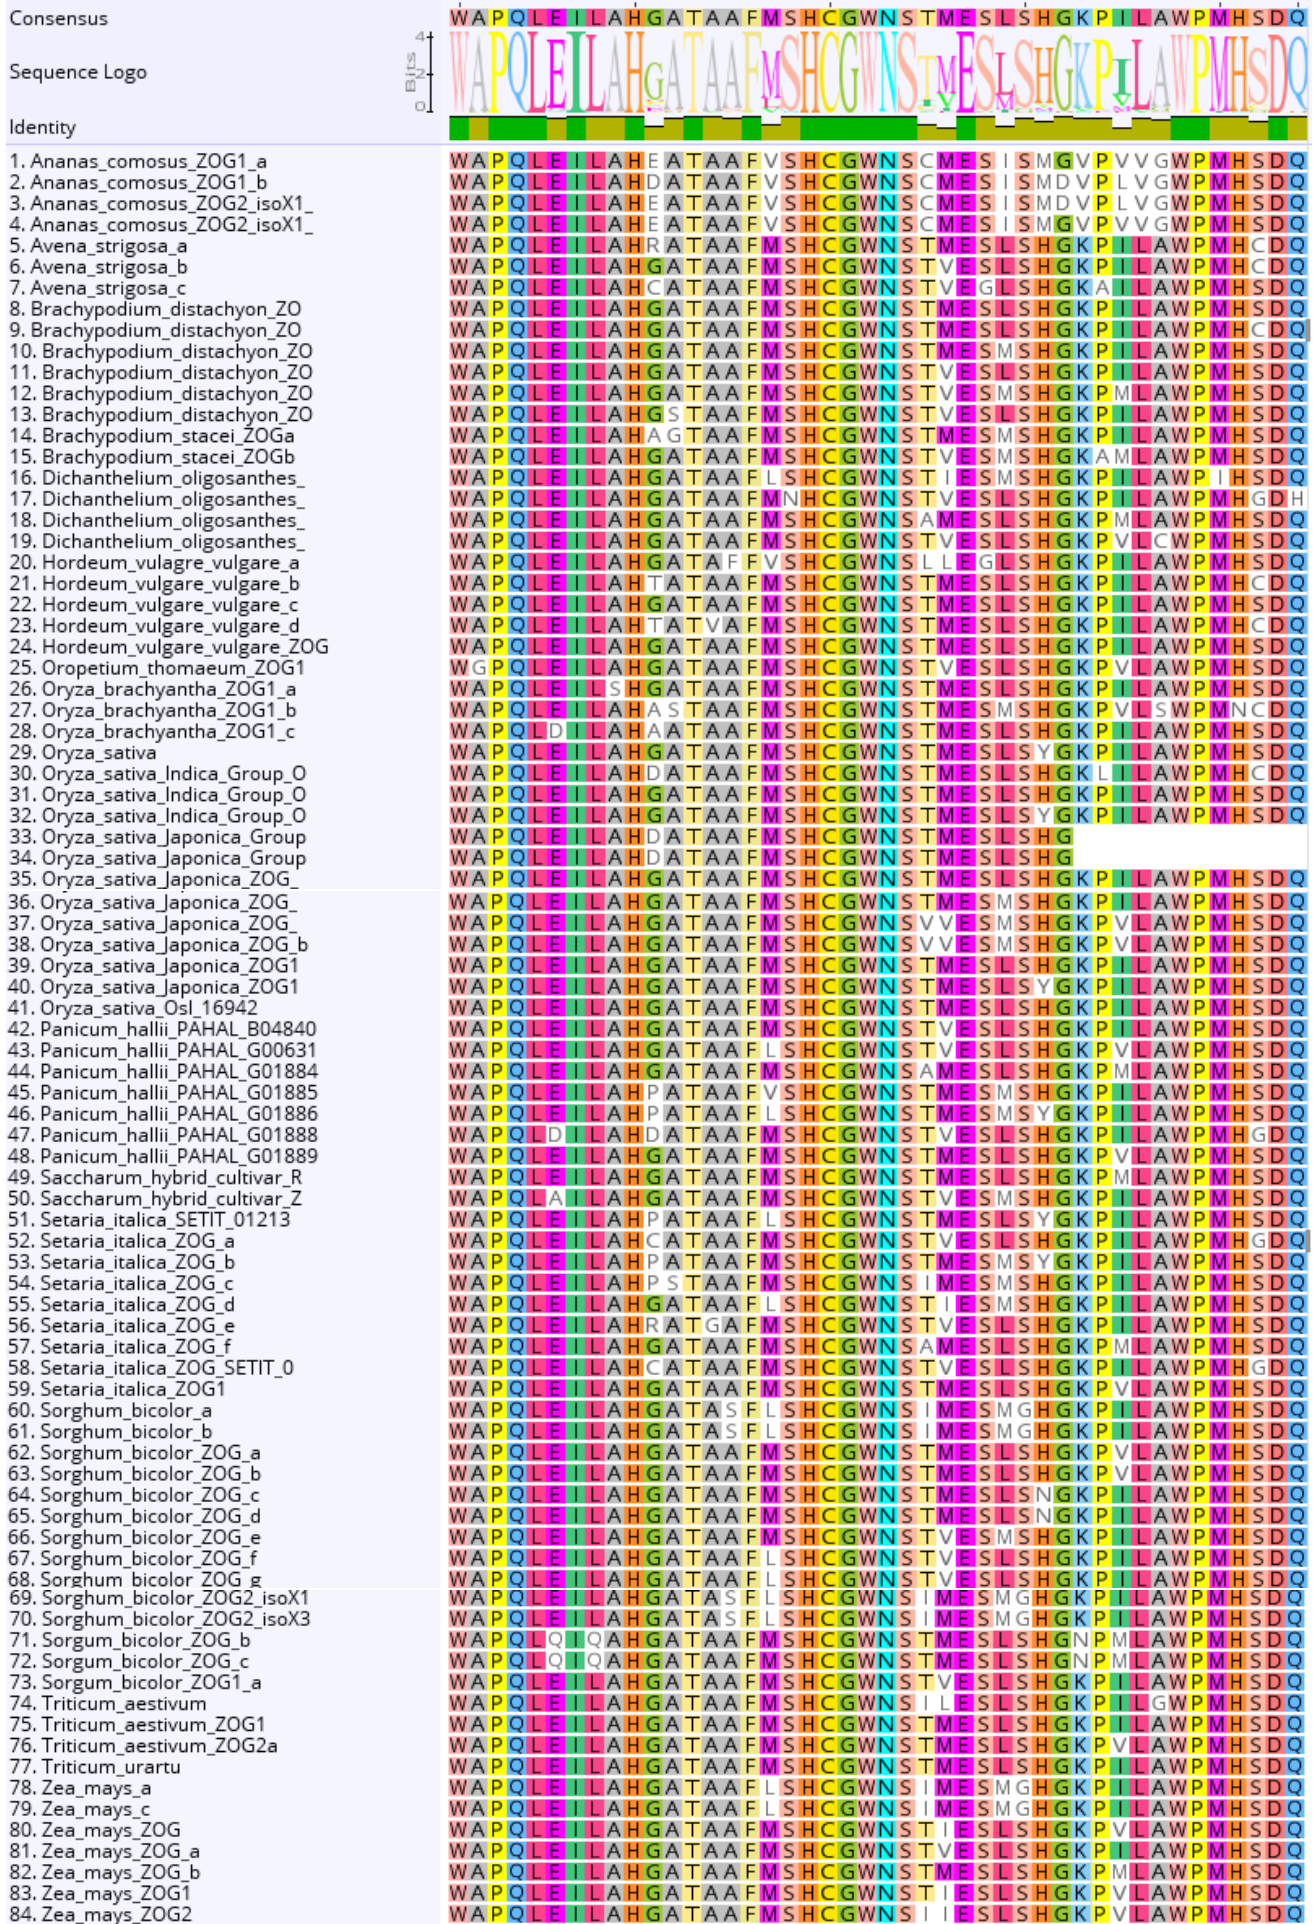

## DICOTS

### Proteales, Ranunculales, Vitales

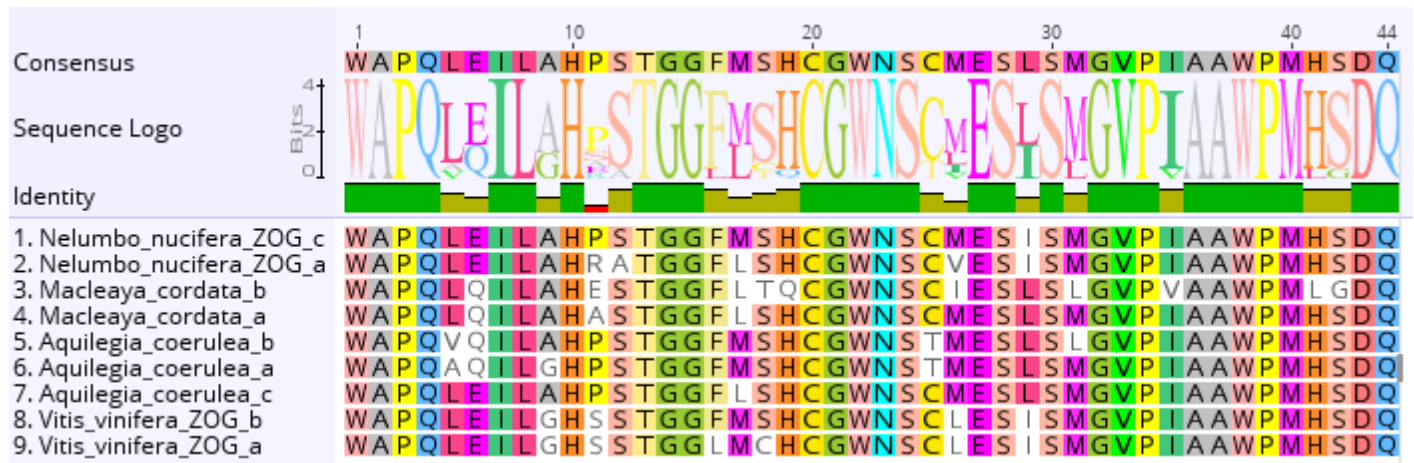

## Fabales

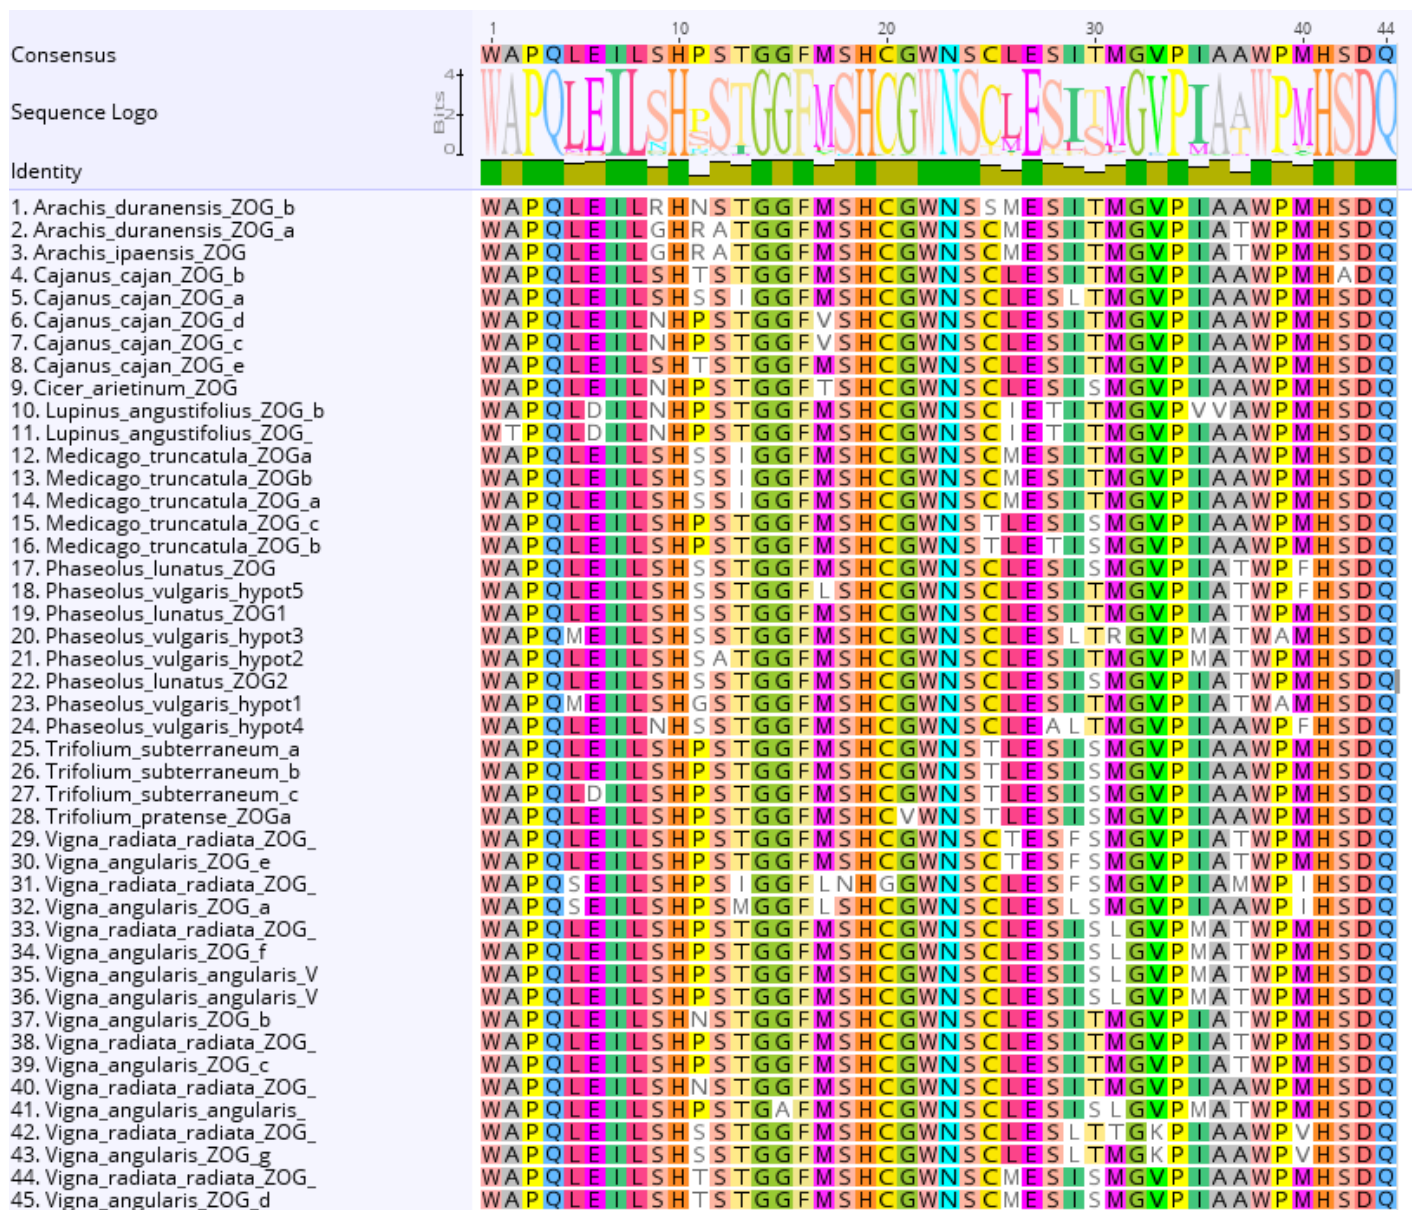

## Rosales

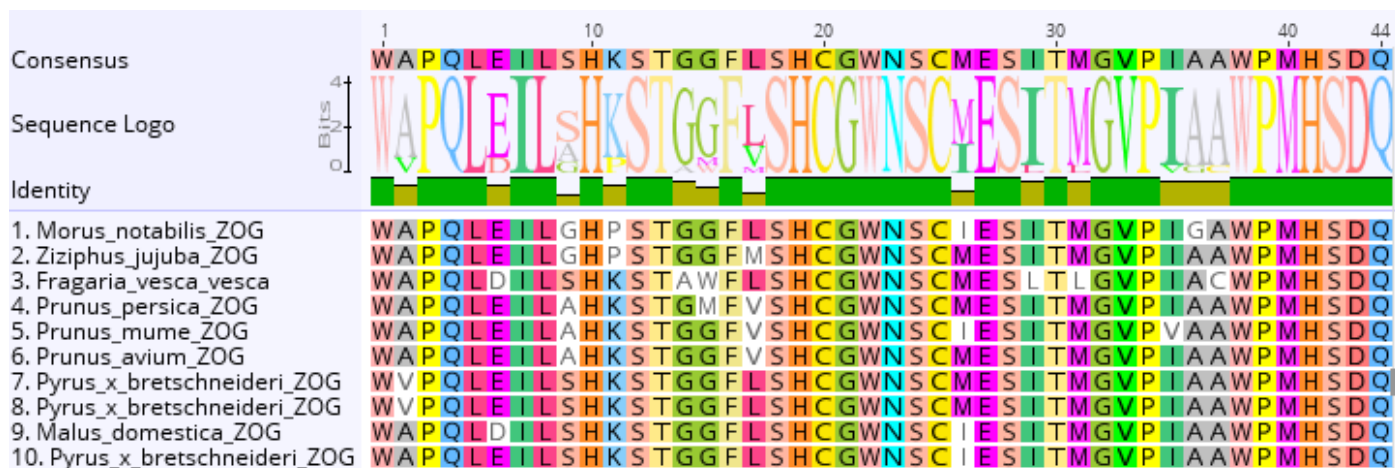

## Fagales, Cucurbitales

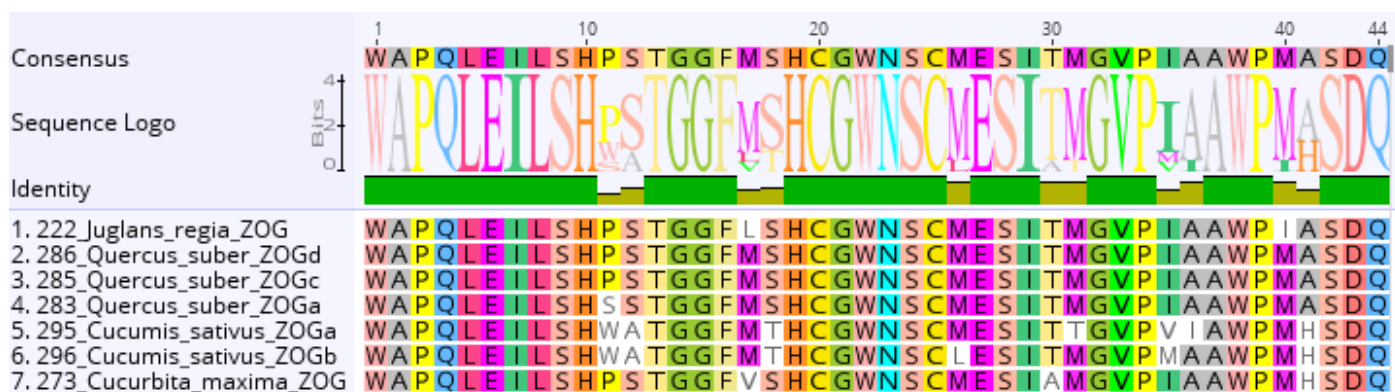

## Malpighiales

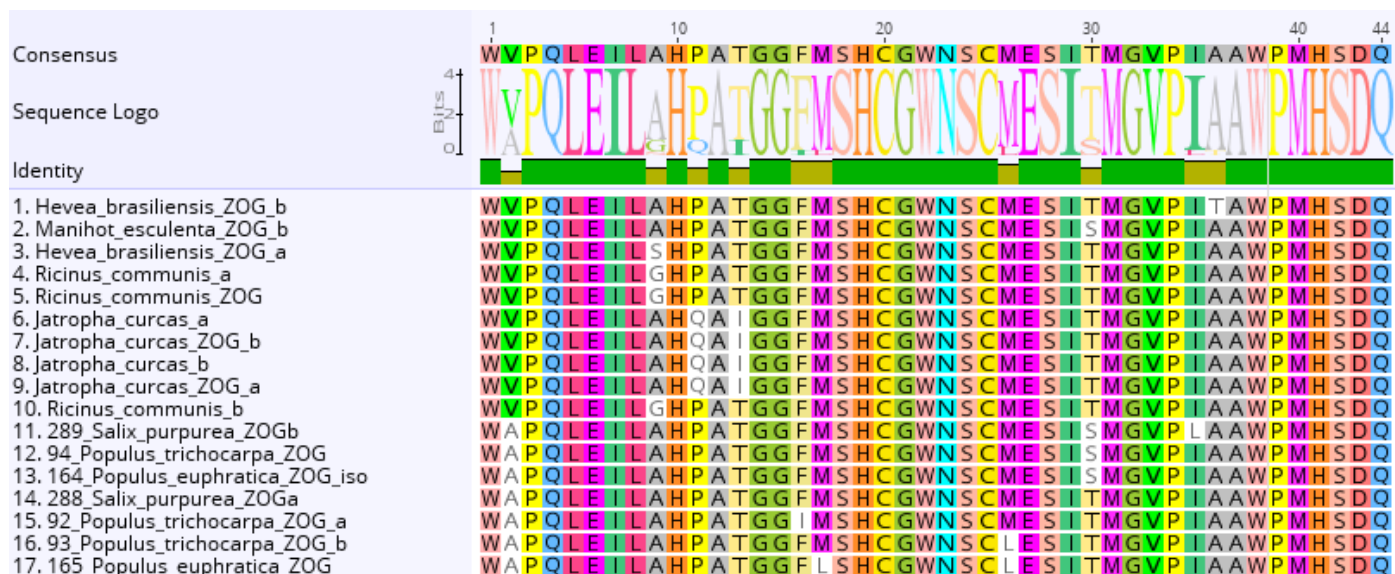

## Myrtales, Sapindales, Malvales

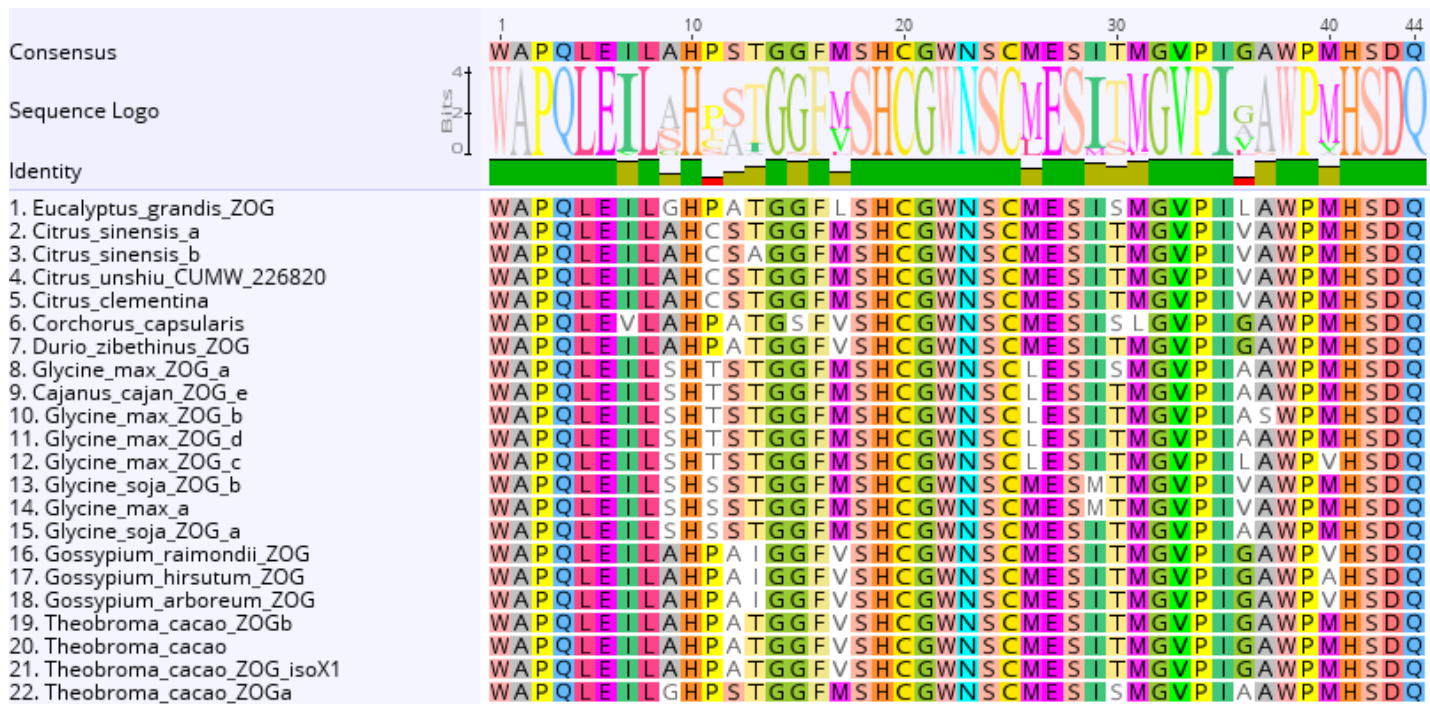

## Brassicales, Caryophyllales, Gentianales

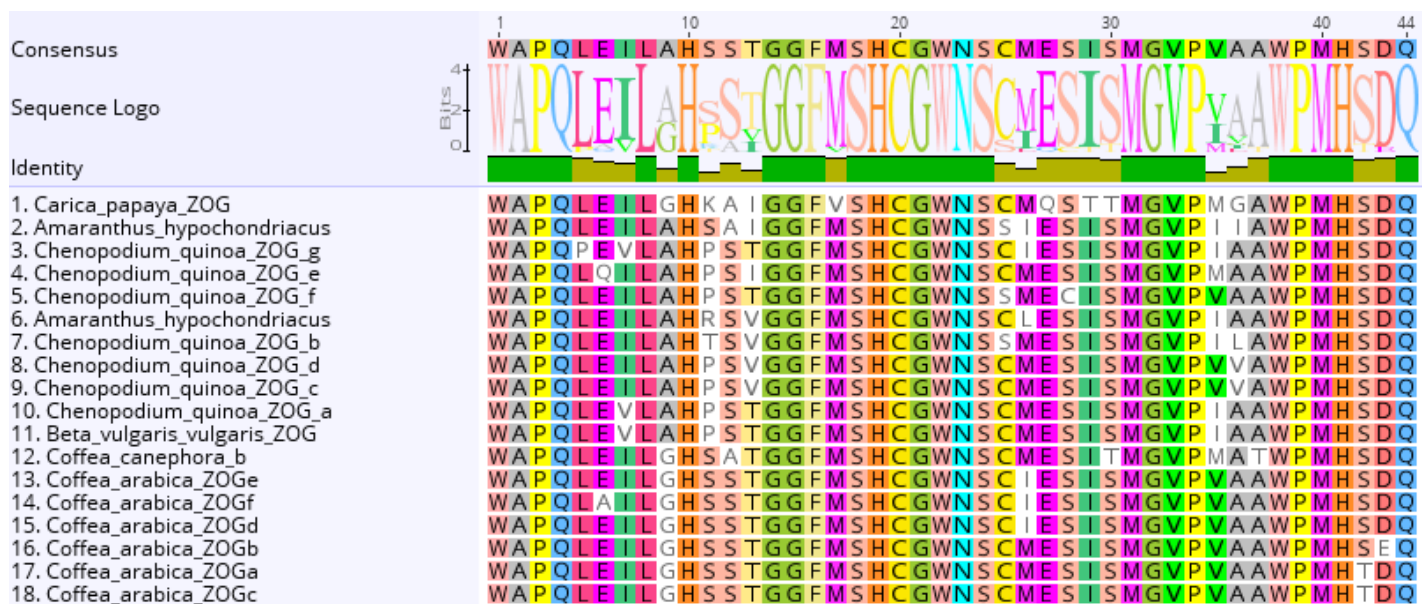

## Solanales

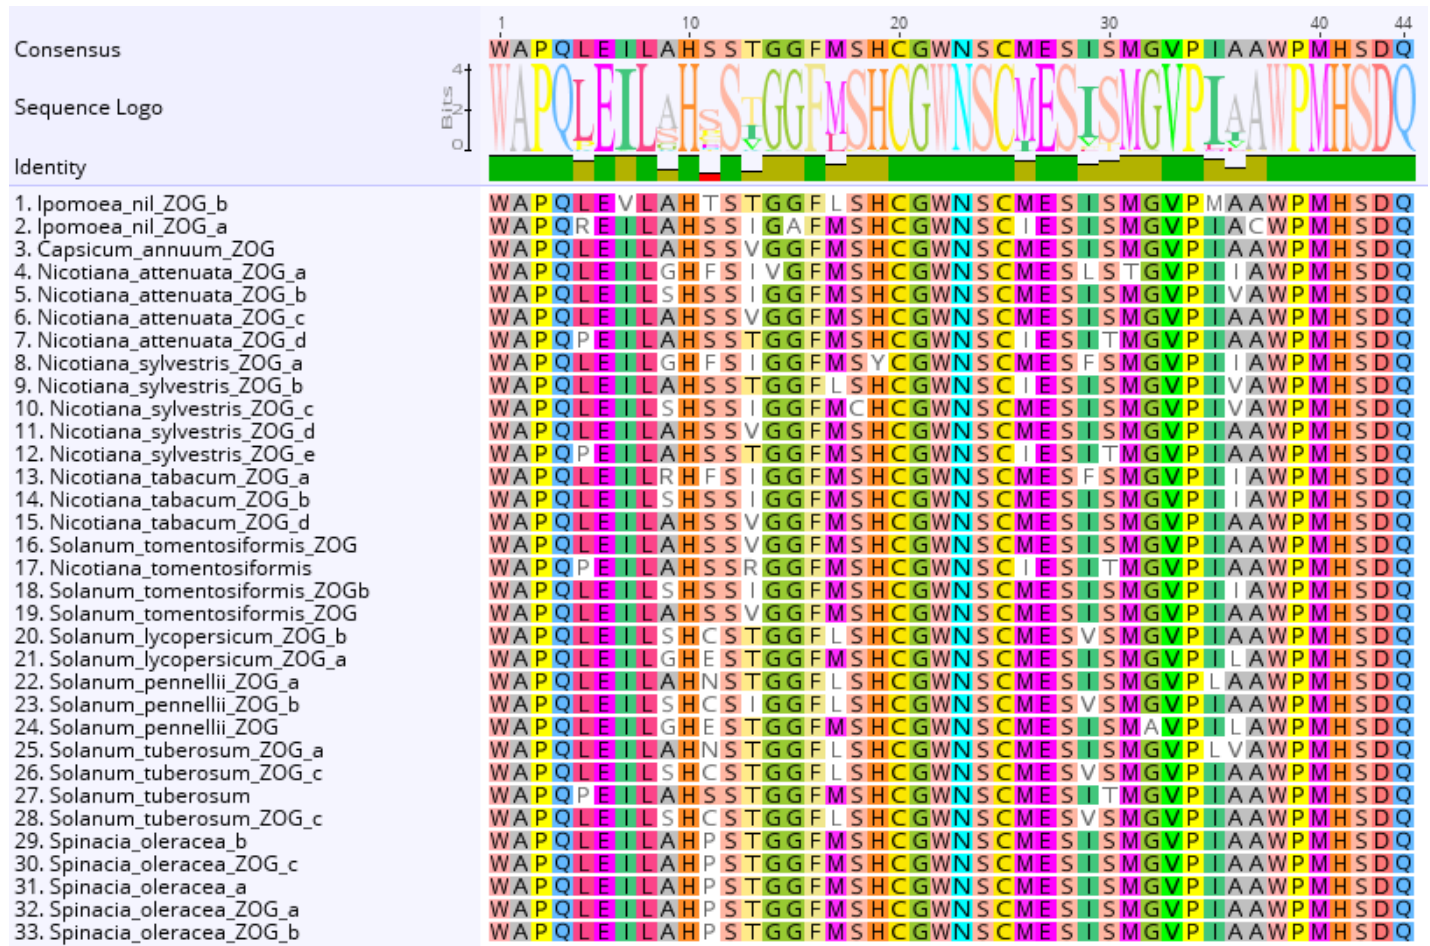

## Lamiales, Asterales, Apiales

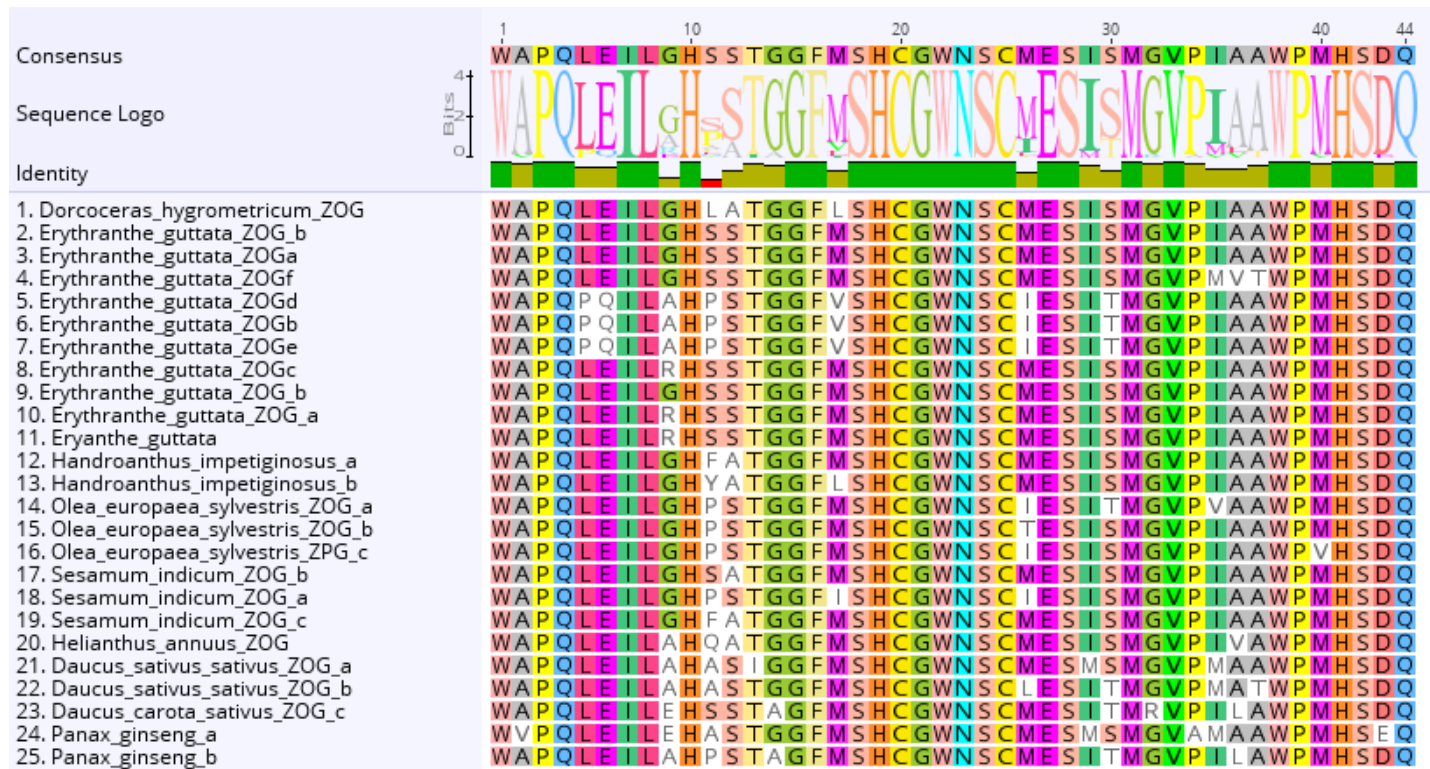

Supplement: 41598_2021_87047_MOESM1_ESM.pdf [file 41598_2021_87047_MOESM1_ESM.pdf]
