# Supplementary material for: Evolutionary diversification of cytokinin-specific glucosyltransferases in angiosperms and enigma of missing cis-zeatin O-glucosyltransferase gene in Brassicaceae
Source: PubMed Central journal article supplement (PMC8041765; doi:10.1038/s41598-021-87047-8), 2021-04-12

# Evolutionary diversification of cytokinin-specific glucosyltransferases in angiosperms and enigma of missing *cis*-zeatin O-glucosyltransferase gene in Brassicaceae

Lenka Závěská Drábková, David Honys and Václav Motyka

Figure S3. Maximum likelihood phylogenetic tree of *cis*ZOG and *trans*ZOG (UGT73C for Brassicaceae) based on combined data from Phytozome v12. Numbers below branches indicate bootstrap support values and fifteen conserved motifs are shown for each sequence.

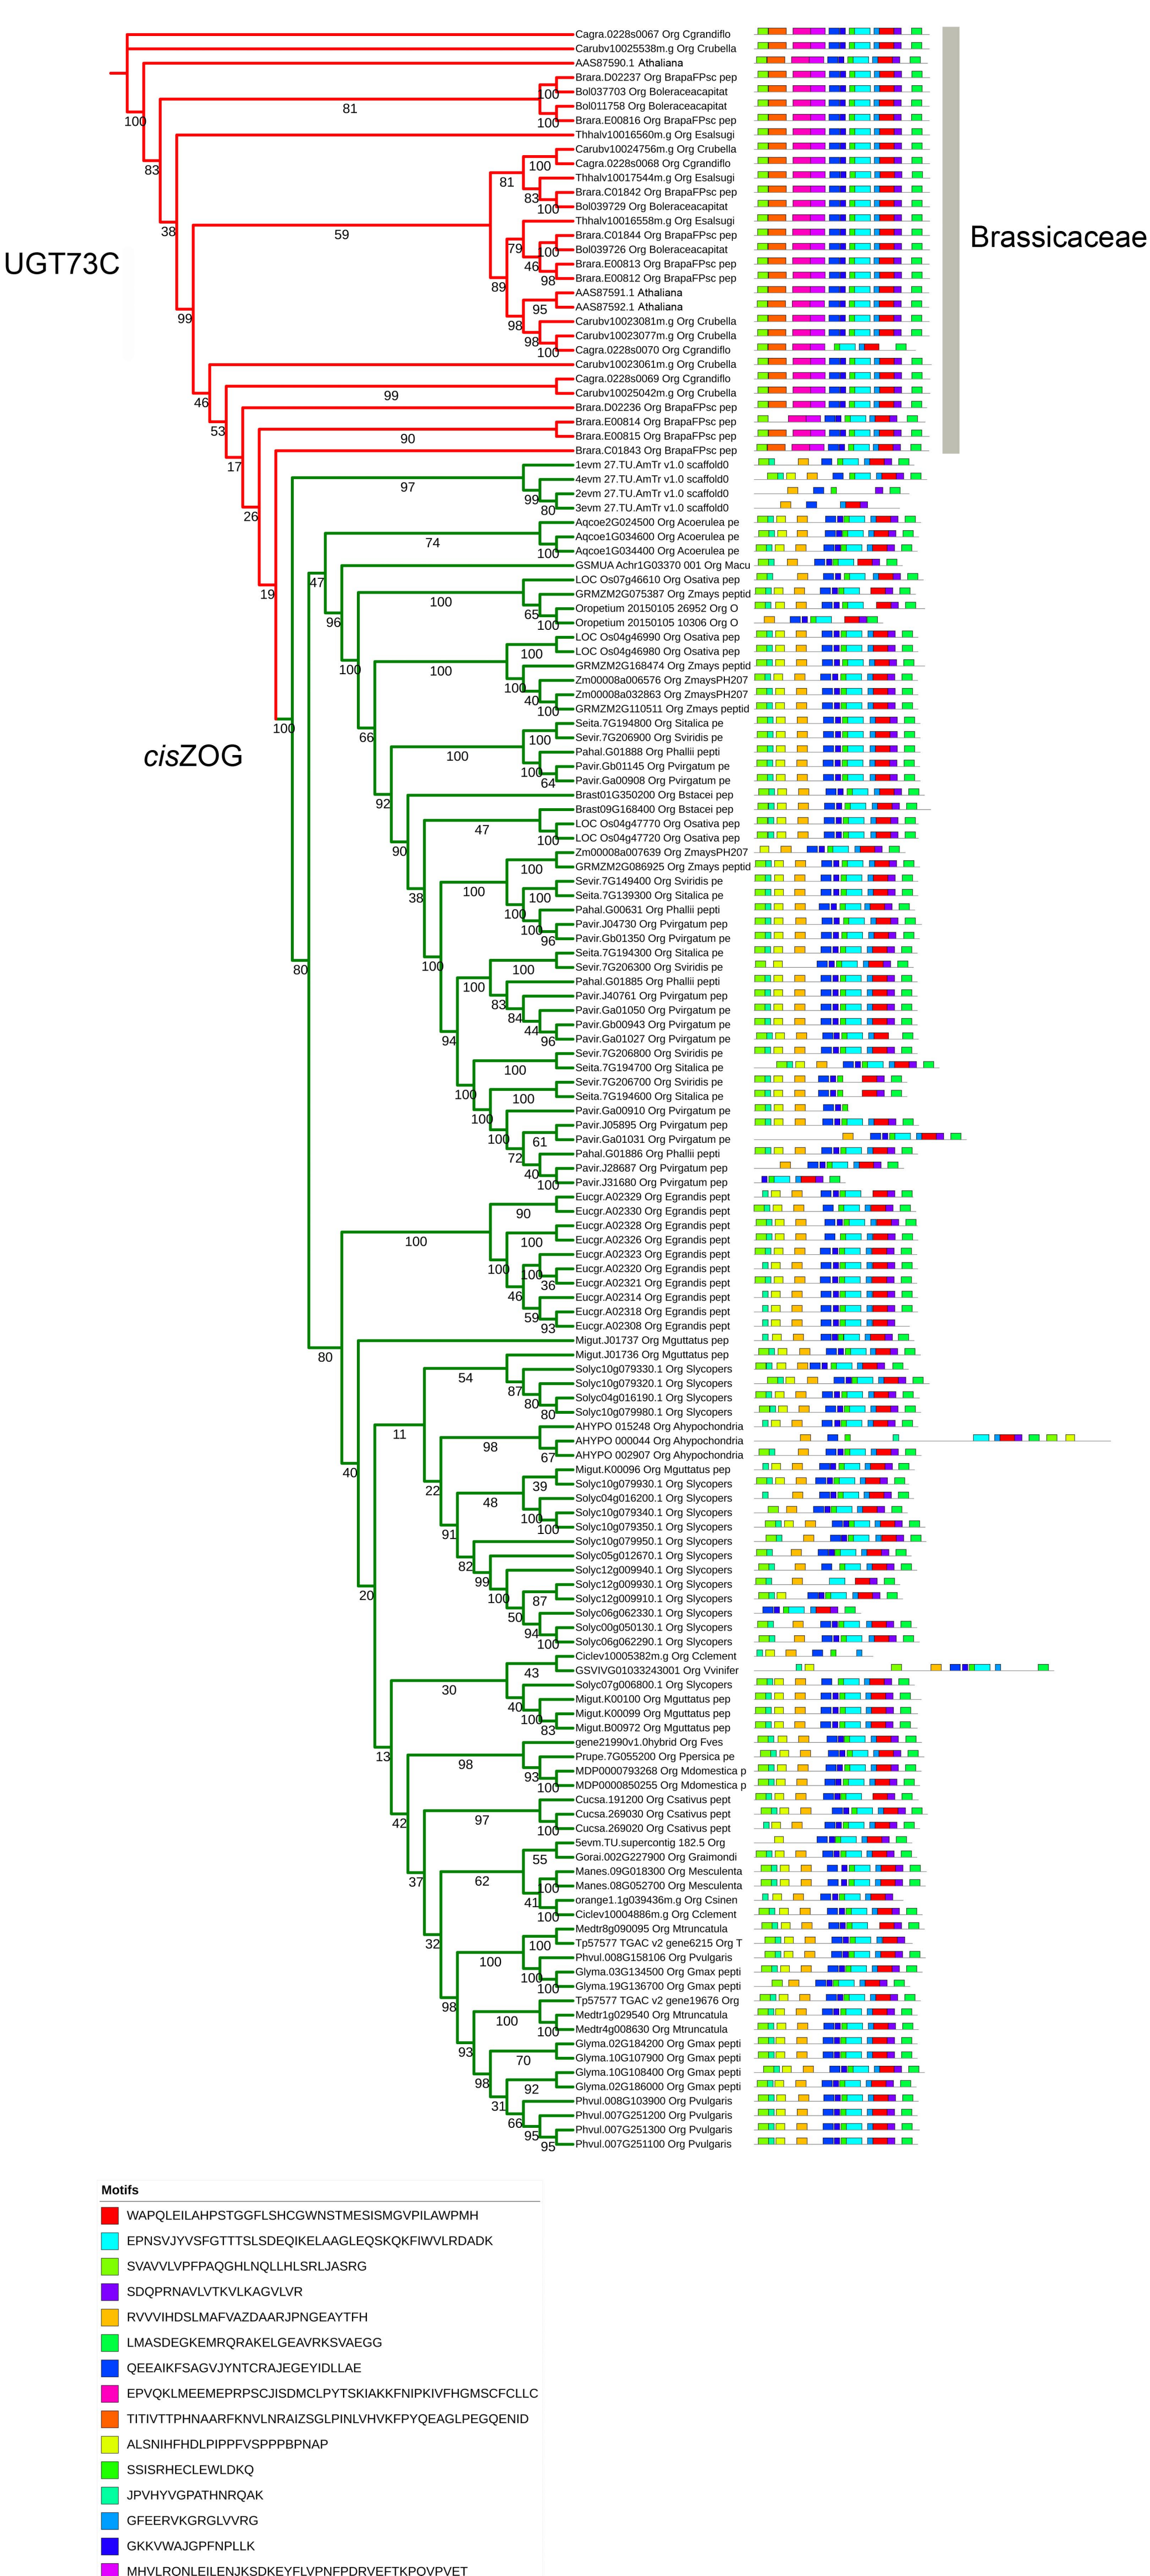

Supplement: 41598_2021_87047_MOESM3_ESM.pdf [file 41598_2021_87047_MOESM3_ESM.pdf]
